# Supplementary material for: Feasibility of Low Latency, Single-Sample Delay Resampling: A New Kriging Based Method
Source: MDPI journal article supplement (doi:10.3390/a16040203), 2023-04-11
Supplement: s1 [file s1]

## Supplementary Files / Data attachment

Reiner Jedermann, University Bremen, Germany, Institute for Microsensors, -Actuators and -Systems (IMSAS), 17. April 2023

Please cite the main article if you are using the supplementary files:

**Jedermann, R.: Feasibility of Low Latency, Single-Sample Delay Resampling: A New Kriging Based Method. In: Algorithms 16, no. 4: 203. (doi: [10.3390/a16040203](https://doi.org/10.3390/a16040203))**

This supplement contains the simulation results in JSON format, as well as Matlab scripts to plot figures 6 and 8 to 13. You might use the data files to compare the article results with other newly developed methods.

### Test numbers

The test numbers are given by the figure number times 10 plus an offset of 1 or 2, if the figure contains part (a) and (b). The JSON keys consist of a "T" followed by the test number.

### Interpolation methods

Each figure compares several methods and/or parameter settings. They are listed as M1, M2, ... in the JSON file.

The window half width is given in square brackets [HW].

The range "r" is given for Kriging in the list of methods. The nugget "n" is only given, if it is non-zero.

Tests of the single-delay scenario are marked with "update-mode"

The RMSE for edges of the available sensor data is only given for T60 (Figure 6). The RMSE for the centre of the input signal is always given as list for frequencies und method number.

### Run the Matlab scripts

The Matlab scripts are only provided to reproduce the figures as printed in the main text, not for tutorial purposes. You might use them to display the figures in a larger scale.

Figures 8a+b are plotted with *Plot\_Fig8\_NoiseResponse.m*. Adjust *figNum* to 81 or 82.

For the other figures use *Plot\_MDPI\_Mrz30.m*. Set *figNum* to the test number (60, 91, 92, 100, 111, 112, 120, 130). You can also adjust the *RMSE\_THRESHOLD* to either -40 dB or -60 dB.

### List of files

| File name                        | Purpose                                                |
|----------------------------------|--------------------------------------------------------|
| <i>findIntersection.m</i>        | Helper for Matlab plotting                             |
| <i>Plot_Fig8_NoiseResponse.m</i> | Plotting noise amplification in figures 8a+b           |
| <i>Plot_MDPI_Mrz30.m</i>         | Matlab plotting for figures 6, 9a+b, 10, 11a+b, 12, 13 |
| <i>SimResults_Mar30.json</i>     | Simulation results in JSON format                      |
