# Supplementary material for: Feasibility of Low Latency, Single-Sample Delay Resampling: A New Kriging Based Method
Source: MDPI journal article supplement (doi:10.3390/a16040203), 2023-04-11
Supplement: s1 [file s1]

Archive with 5 entries (5 files):
- Data_ReadMe.pdf
- findIntersection.m
- Plot_Fig8_NoiseResponse.m
- Plot_MDPI_Mrz30.m
- SimResults_Mar30.json
