# Supplementary material for: Feasibility of Low Latency, Single-Sample Delay Resampling: A New Kriging Based Method
Source: MDPI journal article supplement (doi:10.3390/a16040203), 2023-04-11
Supplement: s1 [file s1 › SimResults_Mar30.json]

{
"Copyright": "This data set might be freely used, if the original publication is cited  (c) Reiner Jedermann, Univesity Bremen, 2023",
"PleaseCiteAs": "Jedermann, R.: Feasibility of Low Latency, Single-Sample Delay Resampling: A New Kriging Based Method. In: Algorithms 16, no. 4: 203. (doi:  10.3390/a16040203)",
"Homepage": "http://intelligentcontainer.com",

"T60": {"TestNum": 60, 
"Name": "Fig 6 t_max=200, step 0.01 all methods with edges uniform", 
"F_List": [0.01, 0.02, 0.03, 0.04, 0.05, 0.06, 0.07, 0.08, 0.09, 0.1, 0.11, 0.12, 0.13, 0.14, 0.15, 0.16, 0.17, 0.18, 0.19, 0.2, 0.21, 0.22, 0.23, 0.24, 0.25, 0.26, 0.27, 0.28, 0.29, 0.3, 0.31, 0.32, 0.33, 0.34, 0.35, 0.36, 0.37, 0.38, 0.39, 0.4, 0.41, 0.42, 0.43, 0.44, 0.45, 0.46, 0.47, 0.48, 0.49], 
"T_max": 200, 
"n_freq": 49, 
"Methods": {
"M1": "Krig[25] r=6.00  Sine", 
"M2": "Magrolis[18]  Sine", 
"M3": "Lagrange[18]  Sine", 
"M4": "Akima  Sine"}, 
"RmseEdges": {
"M1": [4.813e-05, 5.972e-05, 4.92e-05, 5.415e-05, 7.177e-05, 7.014e-05, 5.254e-05, 4.606e-05, 3.677e-05, 2.62e-06, 4.228e-05, 6.497e-05, 0.00011066, 0.00018428, 0.00022433, 0.00024649, 0.00031928, 0.00037189, 0.00031298, 0.00026561, 0.00027789, 7.429e-05, 0.0004058, 0.00072609, 0.0011672, 0.00255663, 0.00440241, 0.00570309, 0.00834069, 0.01479293, 0.02192253, 0.02722536, 0.04126008, 0.07439495, 0.11045613, 0.1388249, 0.22198257, 0.44062484, 0.72004029, 0.91852635, 1.31984966, 2.72507289, 5.0955719, 5.71672446, 0.29660974, 14.26566417, 30.89780382, 37.87405851, 26.20521076], 
"M2": [2.2e-07, 1.1e-07, 1e-08, 1.8e-07, 2e-07, 2e-07, 3.9e-07, 8e-08, 7e-08, 5.1e-07, 1.3e-07, 1.16e-06, 1.17e-06, 1e-07, 8.2e-07, 2.57e-06, 2.95e-06, 1.242e-05, 7.09e-06, 4.73e-06, 2.15e-05, 2.765e-05, 0.00022113, 0.00057883, 0.00037391, 0.00089579, 0.01087039, 0.07105145, 0.22881444, 0.47769582, 0.62161459, 0.16839912, 1.67658636, 5.35714117, 10.32997172, 14.15270545, 12.54096806, 1.44836862, 22.70800784, 53.85221398, 81.1808311, 88.65828153, 62.60017699, 3.07623651, 85.847652, 166.93178389, 210.83547507, 194.53466352, 116.4658994], 
"M3": [1e-08, 1e-08, 1e-08, 1e-08, 1e-08, 1e-08, 1e-08, 1e-08, 1e-08, 1.4e-07, 1.2e-06, 6.14e-06, 2.007e-05, 3.209e-05, 7.336e-05, 0.00071383, 0.00287088, 0.0077062, 0.01401397, 0.01175604, 0.03015143, 0.16110257, 0.4330609, 0.81337851, 1.04636133, 0.54049811, 1.75677782, 6.45396838, 13.30136072, 19.6022808, 19.66564813, 6.37083187, 28.46892685, 80.2872439, 135.67116477, 166.0028, 136.43225111, 25.54961516, 175.92115649, 405.01098409, 582.36352476, 610.4665161, 423.22818778, 34.57621948, 485.38639034, 945.4360896, 1180.97956402, 1079.1103797, 642.84643984], 
"M4": [2.345e-05, 0.00018599, 0.00061955, 0.00144547, 0.00277622, 0.00471995, 0.00738276, 0.0108642, 0.01529596, 0.02137745, 0.02620226, 0.03512745, 0.04247377, 0.04781891, 0.05683296, 0.07272308, 0.08779943, 0.0865958, 0.09297059, 0.11448137, 0.11009972, 0.11814612, 0.12942862, 0.14248251, 0.15397426, 0.17171978, 0.18719919, 0.20355127, 0.22328399, 0.26254331, 0.24319334, 0.27385261, 0.33124879, 0.3466907, 0.36003754, 0.3977678, 0.45421393, 0.48030616, 0.4819265, 0.51880035, 0.50614891, 0.50973114, 0.50976922, 0.54702634, 0.61959535, 0.71339998, 0.81131663, 0.89849978, 0.96379681]}, 
"RmseCenter": {
"M1": [9.09e-06, 8.17e-06, 9.81e-06, 1.187e-05, 1.17e-05, 9.4e-06, 9.1e-06, 1.084e-05, 1.071e-05, 8.5e-06, 7.29e-06, 9.51e-06, 1.153e-05, 1.162e-05, 1.02e-05, 8.57e-06, 8.22e-06, 9.73e-06, 1.263e-05, 1.47e-05, 1.461e-05, 1.188e-05, 8.8e-06, 8.72e-06, 1.073e-05, 1.121e-05, 1.083e-05, 1.124e-05, 1.394e-05, 2.435e-05, 3.74e-05, 4.688e-05, 7.756e-05, 0.00014222, 0.00018276, 0.00028683, 0.00057662, 0.00085916, 0.00108519, 0.00226508, 0.00412109, 0.00427481, 0.0050403, 0.01066139, 0.01336559, 0.05944219, 0.1973577, 0.3271509, 0.3691608], 
"M2": [1e-08, 1e-08, 1e-08, 1e-08, 1e-08, 1e-08, 1e-08, 1e-08, 1e-08, 1e-08, 1e-08, 1e-08, 1e-08, 1e-08, 1e-08, 1e-08, 1e-08, 1e-08, 1e-08, 1e-08, 1e-08, 1e-08, 1e-08, 1e-08, 2.4e-07, 4e-07, 5.55e-06, 2.985e-05, 8.408e-05, 0.00013294, 0.00018779, 0.00088209, 0.00239375, 0.00407539, 0.00418948, 0.00671707, 0.02102077, 0.03997711, 0.04903912, 0.03865426, 0.0788588, 0.17713937, 0.25371584, 0.24109145, 0.20504884, 0.42376953, 0.68752296, 0.74811972, 0.60046877], 
"M3": [1e-08, 1e-08, 1e-08, 1e-08, 1e-08, 1e-08, 1e-08, 1e-08, 1e-08, 1e-08, 1e-08, 1e-08, 1e-08, 1e-08, 1e-08, 1e-08, 2e-08, 4e-08, 3.4e-07, 1.35e-06, 3.08e-06, 3.42e-06, 1.228e-05, 5.235e-05, 0.00012187, 0.00016311, 0.00016397, 0.00079363, 0.00200935, 0.00305694, 0.00244578, 0.00523992, 0.01610016, 0.02761617, 0.02817, 0.01797685, 0.06655078, 0.13510063, 0.16583278, 0.11048668, 0.13872877, 0.37542283, 0.54763085, 0.49301235, 0.25468653, 0.59944081, 1.07169251, 1.16643454, 0.80771391], 
"M4": [6.11e-06, 5.463e-05, 0.00018286, 0.0004741, 0.00110184, 0.00174682, 0.00283572, 0.00445215, 0.00644376, 0.01166426, 0.0124488, 0.01640791, 0.02098849, 0.02694155, 0.03531198, 0.03828415, 0.04263346, 0.04911766, 0.05258619, 0.08261515, 0.06070032, 0.06807204, 0.07181249, 0.08639265, 0.11593429, 0.1246253, 0.14503486, 0.17380122, 0.19719446, 0.26230042, 0.24955459, 0.27618894, 0.30021432, 0.33058192, 0.36771649, 0.39160527, 0.41946963, 0.45029487, 0.47983056, 0.536447, 0.53641153, 0.56416546, 0.58879964, 0.61200618, 0.63726175, 0.64635007, 0.65822313, 0.67011752, 0.67904333]}, 
"TimeStamp": "30/03/2023 11:54:19"},


"T81": {"TestNum": 81, 
"Name": "Noise Test Group", 
"HW_List": [3, 5, 10, 15, 18, 20, 22, 25, 30], 
"T_max": 200, 
"Methods": {
"M1": "Krig[10] r=6.00  random-jitter", 
"M2": "Magrolis[10]  random-jitter", 
"M3": "Lagrange[10]  random-jitter", 
"M4": "Akima  random-jitter"}, 
"RmseCenter": {
"M1": [1.00210604, 1.03470705, 1.07307385, 1.09058506, 1.09457788, 1.09552785, 1.09572401, 1.09576877, 1.09677211], 
"M2": [1.00395064, 1.02769756, 1.05749149, 1.0884804, 1.1281842, 1.18944727, 1.31280586, 1.90755067, 10.11181296], 
"M3": [0.98691624, 1.0160458, 1.05108932, 1.10107333, 1.2361568, 1.54034435, 2.26664303, 5.77448533, 70.45884037], 
"M4": [0.94488074, 0.94488074, 0.94488074, 0.94488074, 0.94488074, 0.94488074, 0.94488074, 0.94488074, 0.94488074]}, 
"TimeStamp": "29/03/2023 08:40:53"},

"T82": {"TestNum": 82, 
"Name": "Noise Test Single delay jitter", 
"HW_List": [3, 4, 6, 8, 9, 10, 12, 15, 18, 20, 25], 
"T_max": 200, 
"Methods": {
"M1": "Krig[20] r=6.50  random-jitter  update-mode", 
"M2": "Magrolis[10]  random-jitter  update-mode", 
"M3": "Lagrange[10]  random-jitter  update-mode", 
"M4": "Akima  random-jitter  update-mode", 
"M5": "Krig[10] r=6.50,n=1e-06  random-jitter  update-mode"}, 
"RmseCenter": {
"M1": [1.06691827, 1.17962321, 1.51915266, 2.18654208, 2.65681355, 3.30401716, 5.01815117, 8.94581769, 15.01764225, 20.06507238, 36.56182353], 
"M2": [1.01492025, 1.13504093, 1.46526124, 2.33146555, 2.72431116, 4.47903948, 9.77442131, 28.7680722, 148.83190762, 380.87719863, 3507.13174918], 
"M3": [1.08986083, 1.24764, 1.91129292, 4.11136723, 6.53456885, 10.61900415, 29.51638814, 159.89373873, 924.83780419, 2953.52450648, 64175.04291281], 
"M4": [0.93513512, 0.93513512, 0.93513512, 0.93513512, 0.93513512, 0.93513512, 0.93513512, 0.93513512, 0.93513512, 0.93513512, 0.93513512], 
"M5": [1.06622128, 1.17519356, 1.38453573, 1.32669591, 1.33674912, 1.32403901, 1.31630376, 1.3174226, 1.31583838, 1.31516447, 1.31430985]}, 
"TimeStamp": "29/03/2023 11:28:11"},


"T91": {"TestNum": 91, 
"Name": "Fig 8a t_max=200, step 0.01 all methods, group, clean", 
"F_List": [0.01, 0.02, 0.03, 0.04, 0.05, 0.06, 0.07, 0.08, 0.09, 0.1, 0.11, 0.12, 0.13, 0.14, 0.15, 0.16, 0.17, 0.18, 0.19, 0.2, 0.21, 0.22, 0.23, 0.24, 0.25, 0.26, 0.27, 0.28, 0.29, 0.3, 0.31, 0.32, 0.33, 0.34, 0.35, 0.36, 0.37, 0.38, 0.39, 0.4, 0.41, 0.42, 0.43, 0.44, 0.45, 0.46, 0.47, 0.48, 0.49], 
"T_max": 200, 
"n_freq": 49, 
"Methods": {
"M1": "Krig[25] r=6.00  Sine  random-jitter", 
"M2": "Krig[25] r=6.60  Sine  missing-samples", 
"M3": "Magrolis[18]  Sine  random-jitter", 
"M4": "Magrolis[18]  Sine  missing-samples", 
"M5": "Lagrange[18]  Sine  random-jitter", 
"M6": "Lagrange[18]  Sine  missing-samples", 
"M7": "Akima  Sine  random-jitter", 
"M8": "Akima  Sine  missing-samples", 
"M9": "WSI[20]  Sine", 
"M10": "WSI[20]  Sine  missing-samples"}, 
"RmseCenter": {
"M1": [1.542e-05, 1.464e-05, 1.524e-05, 1.615e-05, 1.471e-05, 1.576e-05, 1.547e-05, 1.52e-05, 1.56e-05, 1.614e-05, 1.554e-05, 1.58e-05, 1.416e-05, 1.491e-05, 1.614e-05, 1.592e-05, 1.572e-05, 1.623e-05, 1.52e-05, 1.502e-05, 1.549e-05, 1.514e-05, 1.518e-05, 1.522e-05, 1.479e-05, 1.439e-05, 1.721e-05, 2.007e-05, 2.264e-05, 3.587e-05, 5.504e-05, 6.775e-05, 0.00011892, 0.00021524, 0.00026833, 0.00043456, 0.00089027, 0.00126525, 0.00162982, 0.00353665, 0.00621451, 0.0061381, 0.00730782, 0.01572805, 0.01457822, 0.09368127, 0.28201153, 0.41558969, 0.42265022], 
"M2": [2.124e-05, 2.049e-05, 1.937e-05, 1.851e-05, 1.845e-05, 1.95e-05, 2.056e-05, 2.084e-05, 1.916e-05, 2.022e-05, 2.026e-05, 1.988e-05, 1.978e-05, 2.023e-05, 2.075e-05, 2.222e-05, 2.227e-05, 2.335e-05, 2.109e-05, 1.984e-05, 1.939e-05, 1.901e-05, 1.763e-05, 1.897e-05, 2.101e-05, 2.338e-05, 2.655e-05, 3.634e-05, 4.358e-05, 7.568e-05, 0.00012026, 0.00014686, 0.00037431, 0.00042496, 0.00081952, 0.00175995, 0.00250275, 0.00509404, 0.01409229, 0.01843236, 0.05095137, 0.13346611, 0.19344022, 0.63345199, 1.57377839, 2.14068726, 2.76135031, 3.27706539, 3.44620608], 
"M3": [1e-08, 1e-08, 1e-08, 1e-08, 1e-08, 1e-08, 1e-08, 1e-08, 1e-08, 1e-08, 1e-08, 1e-08, 1e-08, 1e-08, 1e-08, 1e-08, 1e-08, 1e-08, 1e-08, 1e-08, 1e-08, 1e-08, 2e-08, 2e-08, 3.9e-07, 3.7e-07, 9.21e-06, 4.793e-05, 0.00012874, 0.00018094, 0.00027637, 0.00142341, 0.00366854, 0.00581416, 0.00522771, 0.01072735, 0.03247918, 0.05777964, 0.06456771, 0.04663542, 0.12127196, 0.25727135, 0.33925148, 0.28262585, 0.2546383, 0.60448867, 0.91063087, 0.89829904, 0.66217203], 
"M4": [1e-08, 1e-08, 1e-08, 1e-08, 1e-08, 1e-08, 1e-08, 1e-08, 1e-08, 1e-08, 1e-08, 1e-08, 1e-08, 1e-08, 1e-08, 1e-08, 1e-08, 1e-08, 1e-08, 1e-08, 1e-08, 4e-08, 1.9e-07, 3.01e-06, 1.544e-05, 3.609e-05, 6.018e-05, 0.0003204, 0.00095151, 0.00160628, 0.00205803, 0.00660287, 0.01550138, 0.02413368, 0.03391111, 0.06436771, 0.12618353, 0.20093096, 0.25590268, 0.37172636, 0.5825967, 0.86437504, 0.92813559, 1.29221284, 1.84916006, 1.87901094, 2.01663224, 2.45405999, 2.56982154], 
"M5": [1e-08, 1e-08, 1e-08, 1e-08, 1e-08, 1e-08, 1e-08, 1e-08, 1e-08, 1e-08, 1e-08, 1e-08, 1e-08, 1e-08, 1e-08, 2e-08, 4e-08, 6e-08, 5.4e-07, 2.12e-06, 4.67e-06, 4.69e-06, 1.994e-05, 8.263e-05, 0.00018583, 0.0002317, 0.00024909, 0.00127149, 0.00308293, 0.00442828, 0.00306987, 0.00862952, 0.02501617, 0.04047714, 0.03727654, 0.02627468, 0.10632267, 0.20045214, 0.2262667, 0.12376679, 0.23140794, 0.56898743, 0.76011829, 0.60010522, 0.28903205, 0.93195553, 1.50262045, 1.47758726, 0.87556735], 
"M6": [1e-08, 1e-08, 1e-08, 1e-08, 1e-08, 1e-08, 1e-08, 1e-08, 1e-08, 1e-08, 1e-08, 1e-08, 1e-08, 1e-08, 1e-08, 1.1e-07, 3.9e-07, 6.9e-07, 1.75e-06, 9.86e-06, 2.773e-05, 4.228e-05, 6.681e-05, 0.00029723, 0.00072027, 0.00101318, 0.00121379, 0.00400703, 0.0088867, 0.01224997, 0.01253165, 0.02975919, 0.06228373, 0.08503481, 0.08798586, 0.14411322, 0.27651877, 0.38627127, 0.39950418, 0.50653932, 0.8184747, 1.12781282, 1.06729728, 1.3708352, 1.96797146, 1.93887326, 1.98379078, 2.44276589, 2.48369976], 
"M7": [4.191e-05, 0.000165, 0.00039756, 0.00080689, 0.00143046, 0.00234633, 0.00364759, 0.0057927, 0.00740169, 0.01281249, 0.01388673, 0.01803991, 0.02205434, 0.031017, 0.03489346, 0.04317333, 0.04734006, 0.05404854, 0.05665582, 0.07902679, 0.06499188, 0.08149372, 0.08702908, 0.10412942, 0.13960971, 0.14912279, 0.16529685, 0.21203684, 0.21797784, 0.26532874, 0.28674189, 0.32766722, 0.34979007, 0.38232073, 0.39824245, 0.42856767, 0.43594656, 0.49117003, 0.50011137, 0.57661773, 0.58773791, 0.62839509, 0.6398476, 0.65728686, 0.65864565, 0.70944531, 0.68908783, 0.70759545, 0.73881062], 
"M8": [7.351e-05, 0.00031291, 0.00079219, 0.00160458, 0.00275133, 0.00500768, 0.00761287, 0.01191678, 0.0184172, 0.0220577, 0.02978032, 0.03611222, 0.04483882, 0.05514331, 0.07012015, 0.07797367, 0.07920137, 0.09939758, 0.11926725, 0.13547447, 0.17706904, 0.20737435, 0.22551478, 0.26303496, 0.29005245, 0.33085921, 0.35493227, 0.40759418, 0.43483091, 0.48769713, 0.48862909, 0.5632775, 0.55533889, 0.58273912, 0.60973307, 0.61764673, 0.64103874, 0.66697934, 0.69814572, 0.75048094, 0.65831597, 0.78326516, 0.81964514, 0.85072224, 0.89472481, 0.87774, 0.90637439, 0.92293678, 0.93353418], 
"M9": [7.897e-05, 0.00015813, 0.00023758, 0.00031741, 0.0003978, 0.00047898, 0.00056107, 0.00064416, 0.00072845, 0.00081418, 0.00090156, 0.00099068, 0.00108177, 0.00117515, 0.00127109, 0.00136977, 0.00147145, 0.00157654, 0.00168547, 0.00179852, 0.00191604, 0.00203859, 0.00216686, 0.00230132, 0.00244243, 0.00259104, 0.00274822, 0.00291478, 0.00309139, 0.00327927, 0.00348012, 0.00369517, 0.00392527, 0.00417197, 0.00443712, 0.00472135, 0.00502419, 0.00534387, 0.00567326, 0.0059969, 0.00626963, 0.00636588, 0.00759009, 0.01841021, 0.04835188, 0.10634862, 0.20048595, 0.33359263, 0.50049101], 
"M10": [0.30568041, 0.30316576, 0.29910836, 0.28976717, 0.30994492, 0.30039487, 0.29758872, 0.29425502, 0.23925507, 0.30053672, 0.29574062, 0.29331073, 0.2936086, 0.28635446, 0.29211173, 0.29634603, 0.3020396, 0.33186991, 0.2939924, 0.29936012, 0.30153504, 0.30497225, 0.2894124, 0.30045753, 0.30284607, 0.30321987, 0.29354341, 0.30888618, 0.30318464, 0.29803977, 0.29037723, 0.32703487, 0.29890086, 0.29590776, 0.29448699, 0.29036203, 0.29751755, 0.29518537, 0.29471155, 0.29701384, 0.23573993, 0.29127002, 0.29811387, 0.30707727, 0.32795156, 0.32997456, 0.3869654, 0.4750551, 0.60008586]}, 
"TimeStamp": "30/03/2023 12:04:38"},

"T92": {"TestNum": 92, 
"Name": "Fig 9b t_max=200, step 0.01 all methods, group, noise", 
"F_List": [0.01, 0.02, 0.03, 0.04, 0.05, 0.06, 0.07, 0.08, 0.09, 0.1, 0.11, 0.12, 0.13, 0.14, 0.15, 0.16, 0.17, 0.18, 0.19, 0.2, 0.21, 0.22, 0.23, 0.24, 0.25, 0.26, 0.27, 0.28, 0.29, 0.3, 0.31, 0.32, 0.33, 0.34, 0.35, 0.36, 0.37, 0.38, 0.39, 0.4, 0.41, 0.42, 0.43, 0.44, 0.45, 0.46, 0.47, 0.48, 0.49], 
"T_max": 200, 
"n_freq": 49, 
"Methods": {
"M1": "Krig[25] r=6.00  Sine  random-jitter  noise=0.001", 
"M2": "Krig[25] r=6.60  Sine  missing-samples  noise=0.001", 
"M3": "Magrolis[18]  Sine  random-jitter  noise=0.001", 
"M4": "Magrolis[18]  Sine  missing-samples  noise=0.001", 
"M5": "Lagrange[18]  Sine  random-jitter  noise=0.001", 
"M6": "Lagrange[18]  Sine  missing-samples  noise=0.001", 
"M7": "Akima  Sine  random-jitter  noise=0.001", 
"M8": "Akima  Sine  missing-samples  noise=0.001"}, 
"RmseCenter": {
"M1": [0.00109593, 0.00109597, 0.00109616, 0.00109596, 0.00109481, 0.00109668, 0.00109456, 0.00109588, 0.00109675, 0.00109528, 0.00109578, 0.00109596, 0.00109546, 0.00109584, 0.00109619, 0.00109667, 0.00109508, 0.00109637, 0.00109593, 0.00109611, 0.00109628, 0.00109773, 0.00109552, 0.00109547, 0.00109617, 0.00109519, 0.00109435, 0.00109575, 0.00109564, 0.00109323, 0.00109227, 0.00109518, 0.00109221, 0.00109983, 0.00111287, 0.00114961, 0.0013525, 0.00162926, 0.00191408, 0.00361362, 0.00620608, 0.0061727, 0.00730981, 0.01563489, 0.01459671, 0.09374014, 0.28207036, 0.41566827, 0.4227494], 
"M2": [0.00127056, 0.00127131, 0.00127131, 0.00127171, 0.00126971, 0.00127165, 0.0012704, 0.00127136, 0.00127078, 0.00127271, 0.0012713, 0.00126987, 0.00127018, 0.00127215, 0.00127094, 0.00127068, 0.00127036, 0.00127123, 0.00126849, 0.0012704, 0.00127101, 0.00127158, 0.00127263, 0.00127143, 0.00127311, 0.00127338, 0.00127342, 0.00127938, 0.00127641, 0.00128974, 0.00130708, 0.00129697, 0.0013857, 0.00136595, 0.00165175, 0.00237078, 0.00305244, 0.00548761, 0.01431122, 0.01849337, 0.05100648, 0.13348319, 0.19302747, 0.63345585, 1.57387078, 2.14050243, 2.76117693, 3.27734503, 3.44620859], 
"M3": [0.00112818, 0.00112818, 0.00112818, 0.00112818, 0.00112818, 0.00112818, 0.00112818, 0.00112818, 0.00112818, 0.00112818, 0.00112818, 0.00112818, 0.00112818, 0.00112818, 0.00112818, 0.00112818, 0.00112818, 0.00112818, 0.00112818, 0.00112818, 0.00112818, 0.00112818, 0.00112819, 0.00112818, 0.0011281, 0.0011282, 0.00113028, 0.00113944, 0.00116083, 0.0011684, 0.00110584, 0.00160362, 0.00361834, 0.00574629, 0.00533402, 0.01104479, 0.03272468, 0.05797924, 0.06470199, 0.04649399, 0.12111139, 0.25710573, 0.33915075, 0.28262549, 0.25474043, 0.6046408, 0.91071851, 0.89842504, 0.66229367], 
"M4": [0.00119735, 0.00119735, 0.00119735, 0.00119735, 0.00119735, 0.00119735, 0.00119735, 0.00119735, 0.00119735, 0.00119735, 0.00119735, 0.00119735, 0.00119735, 0.00119735, 0.00119735, 0.00119735, 0.00119735, 0.00119735, 0.00119735, 0.00119735, 0.00119736, 0.00119735, 0.00119736, 0.00119769, 0.0011996, 0.00120442, 0.00120622, 0.00120738, 0.00138307, 0.00171753, 0.00218742, 0.00692753, 0.01586019, 0.0244315, 0.03395223, 0.06415827, 0.12575525, 0.20068678, 0.25600866, 0.37200472, 0.58287867, 0.86445955, 0.92781191, 1.29216856, 1.84919207, 1.87882214, 2.01653152, 2.45430356, 2.56988581], 
"M5": [0.00123616, 0.00123616, 0.00123616, 0.00123616, 0.00123616, 0.00123616, 0.00123616, 0.00123616, 0.00123616, 0.00123616, 0.00123616, 0.00123616, 0.00123616, 0.00123616, 0.00123616, 0.00123615, 0.00123615, 0.00123617, 0.00123631, 0.00123669, 0.00123717, 0.00123633, 0.00123052, 0.00121753, 0.00120841, 0.00122402, 0.00132892, 0.00199622, 0.00357291, 0.00480226, 0.00327315, 0.00835026, 0.02476062, 0.04026725, 0.03717449, 0.02667302, 0.10662285, 0.20069349, 0.22644934, 0.12373635, 0.23116213, 0.56876834, 0.75995232, 0.60000501, 0.2891442, 0.93215044, 1.5027714, 1.4777712, 0.87577531], 
"M6": [0.00123523, 0.00123523, 0.00123523, 0.00123523, 0.00123523, 0.00123523, 0.00123523, 0.00123523, 0.00123523, 0.00123523, 0.00123523, 0.00123523, 0.00123523, 0.00123523, 0.00123523, 0.00123525, 0.0012353, 0.00123535, 0.00123513, 0.00123395, 0.0012312, 0.00122799, 0.00123305, 0.00129689, 0.00152929, 0.0017821, 0.00191275, 0.00408509, 0.00869701, 0.01189482, 0.012254, 0.03000397, 0.06265969, 0.08541806, 0.0881343, 0.14385342, 0.27603464, 0.38593048, 0.39954092, 0.50687699, 0.81884231, 1.12796695, 1.0670407, 1.37073194, 1.96792976, 1.93865167, 1.98369328, 2.44301489, 2.48379184], 
"M7": [0.00100912, 0.00104956, 0.00109564, 0.00130368, 0.00175117, 0.00254317, 0.00378491, 0.00580059, 0.00742349, 0.01283797, 0.01392589, 0.01804169, 0.02212324, 0.03101058, 0.03489859, 0.04323464, 0.04736345, 0.05400631, 0.05664662, 0.07913742, 0.06500587, 0.08149452, 0.08714, 0.10403429, 0.13964556, 0.14908745, 0.16525863, 0.21208582, 0.21803141, 0.26531274, 0.28683492, 0.3276151, 0.34978866, 0.38228789, 0.39825082, 0.42855394, 0.43596391, 0.49115673, 0.50017217, 0.57664684, 0.5877803, 0.62839497, 0.63986364, 0.6573235, 0.65865539, 0.70943758, 0.68909035, 0.70763435, 0.73879296], 
"M8": [0.0010155, 0.00105335, 0.00125056, 0.00187282, 0.00290031, 0.00502761, 0.00764887, 0.01177422, 0.01832093, 0.02199961, 0.02969912, 0.03607204, 0.0448862, 0.05510335, 0.07009525, 0.07821356, 0.07913184, 0.09938725, 0.11889137, 0.13537482, 0.17697085, 0.2072872, 0.22543924, 0.2628137, 0.28991365, 0.33079309, 0.35484063, 0.4075046, 0.43483226, 0.48761219, 0.48858513, 0.56331134, 0.5552611, 0.58274511, 0.60965966, 0.61741318, 0.6410402, 0.6669756, 0.69823893, 0.75040778, 0.65831464, 0.78318952, 0.81954783, 0.8507498, 0.89473017, 0.87767204, 0.90635362, 0.9230555, 0.93356927]}, 
"TimeStamp": "30/03/2023 12:22:50"},


"T100": {"TestNum": 100, 
"Name": "Fig 10 single step=0.005 tmax=200 All methods clean jitter/missing", 
"F_List": [0.01, 0.015, 0.02, 0.025, 0.03, 0.035, 0.04, 0.045, 0.05, 0.055, 0.06, 0.065, 0.07, 0.075, 0.08, 0.085, 0.09, 0.095, 0.1, 0.105, 0.11, 0.115, 0.12, 0.125, 0.13, 0.135, 0.14, 0.145, 0.15, 0.155, 0.16, 0.165, 0.17, 0.175, 0.18, 0.185, 0.19, 0.195, 0.2, 0.205, 0.21, 0.215, 0.22, 0.225, 0.23, 0.235, 0.24, 0.245, 0.25, 0.255, 0.26, 0.265, 0.27, 0.275, 0.28, 0.285, 0.29, 0.295, 0.3, 0.305, 0.31, 0.315, 0.32, 0.325, 0.33, 0.335, 0.34, 0.345, 0.35, 0.355, 0.36, 0.365, 0.37, 0.375, 0.38, 0.385, 0.39, 0.395, 0.4, 0.405, 0.41, 0.415, 0.42, 0.425, 0.43, 0.435, 0.44, 0.445, 0.45, 0.455, 0.46, 0.465, 0.47, 0.475, 0.48, 0.485, 0.49, 0.495], 
"T_max": 200, 
"n_freq": 98, 
"Methods": {
"M1": "Krig[20] r=6.50  Sine  random-jitter  update-mode", 
"M2": "Krig[20] r=7.15  Sine  missing-samples  update-mode", 
"M3": "Magrolis[10]  Sine  random-jitter  update-mode", 
"M4": "Magrolis[10]  Sine  missing-samples  update-mode", 
"M5": "Lagrange[10]  Sine  random-jitter  update-mode", 
"M6": "Lagrange[10]  Sine  missing-samples  update-mode", 
"M7": "Akima  Sine  random-jitter  update-mode", 
"M8": "Akima  Sine  missing-samples  update-mode"}, 
"RmseCenter": {
"M1": [4.472e-05, 5.931e-05, 5.866e-05, 5.727e-05, 4.808e-05, 4.452e-05, 4.989e-05, 5.951e-05, 6.751e-05, 6.585e-05, 5.984e-05, 5.544e-05, 6.117e-05, 7.219e-05, 8.439e-05, 9.074e-05, 8.82e-05, 8.601e-05, 8.49e-05, 0.0001016, 0.00012139, 0.00014633, 0.00014601, 0.0001449, 0.00013038, 0.00015236, 0.0001897, 0.00024205, 0.0002648, 0.00027492, 0.00027029, 0.00028836, 0.00033688, 0.00045163, 0.00054331, 0.00064947, 0.00066881, 0.00063711, 0.00069505, 0.00086026, 0.00111478, 0.00140613, 0.00174767, 0.00186139, 0.00190531, 0.00205728, 0.00253161, 0.00343628, 0.00474256, 0.00595082, 0.00724673, 0.0077061, 0.00804865, 0.00858393, 0.01125604, 0.01478303, 0.02113785, 0.02963919, 0.03496109, 0.04133648, 0.04355272, 0.04697214, 0.05834054, 0.08171649, 0.12210722, 0.16755222, 0.23646489, 0.30349785, 0.35992998, 0.41072216, 0.44320042, 0.47190437, 0.62966835, 0.94013772, 1.45246426, 2.22998531, 3.19903298, 4.65691627, 6.53256315, 7.8197815, 10.60138195, 13.60462183, 16.77315864, 20.25484718, 25.11883358, 30.8192122, 34.89147484, 38.48125402, 43.27716343, 48.92900738, 57.04896636, 58.90183641, 64.85503518, 72.1867696, 77.35141006, 75.24927282, 82.76163073, 82.90163688], 
"M2": [9.197e-05, 0.00011284, 0.00011283, 0.00010012, 9.415e-05, 0.0001093, 0.00013332, 0.00017895, 0.00013005, 0.00011379, 0.00010743, 0.00012966, 0.00016221, 0.00018085, 0.0001753, 0.00015205, 9.619e-05, 0.00019665, 0.00024051, 0.00027163, 0.00027432, 0.00026653, 0.00029902, 0.00039513, 0.00051704, 0.00067483, 0.00054712, 0.00053728, 0.00054174, 0.00068285, 0.00092853, 0.00116296, 0.00129667, 0.0013062, 0.00122982, 0.00170422, 0.00223929, 0.0029226, 0.00348393, 0.00377532, 0.00392099, 0.00451877, 0.00621275, 0.00888345, 0.0116507, 0.01407767, 0.01534203, 0.01544929, 0.01608418, 0.0208319, 0.03101965, 0.04452564, 0.05772531, 0.07480481, 0.08388621, 0.09748085, 0.12818917, 0.18925803, 0.28354931, 0.40539787, 0.54171108, 0.65887516, 0.8900909, 0.91644181, 0.94043572, 1.01776269, 1.39635785, 2.29616408, 3.78730464, 5.91073589, 8.59187022, 13.98012745, 17.79795067, 23.35436597, 29.95208877, 37.50675619, 45.90231306, 54.91221404, 63.9837678, 70.41952136, 118.14579506, 105.47916399, 113.99581931, 123.23838783, 131.83016446, 139.15891885, 144.74298347, 147.98436331, 146.87870381, 207.97908961, 157.31558683, 151.39137979, 145.544618, 139.03248251, 132.1672924, 125.56495378, 119.98662593, 116.20318756], 
"M3": [6.722e-05, 9.513e-05, 0.00010935, 0.00012, 0.00011855, 9.718e-05, 7.611e-05, 4.031e-05, 7.3e-06, 4.412e-05, 8.617e-05, 0.00012318, 0.00014726, 0.00015699, 0.00015387, 0.00013844, 0.00010225, 5.522e-05, 2.427e-05, 7.596e-05, 0.00013887, 0.00021392, 0.00025046, 0.00028839, 0.00028527, 0.00025593, 0.00020598, 0.00012072, 7.727e-05, 0.00019801, 0.00034609, 0.00050479, 0.00065068, 0.00076123, 0.00078672, 0.00074104, 0.00060554, 0.00038815, 0.00037004, 0.0008009, 0.00141218, 0.00213137, 0.00285314, 0.00332586, 0.00374297, 0.00386186, 0.0031244, 0.00254378, 0.00331949, 0.00757128, 0.01372969, 0.02422472, 0.03716438, 0.05422717, 0.07611873, 0.09902672, 0.13542881, 0.18425338, 0.23045656, 0.30272951, 0.36238922, 0.43156107, 0.56097757, 0.64218491, 0.77916188, 0.95430027, 1.0779878, 1.2292711, 1.44470702, 1.65284395, 1.92164013, 2.24982654, 2.51698576, 2.67784877, 3.10750699, 3.23600047, 3.81292706, 4.15971009, 4.56779595, 4.94156331, 5.38773058, 5.7027886, 6.1842989, 6.74386661, 6.72308241, 6.91903298, 7.65407803, 8.310438, 8.75991976, 8.92127165, 8.92683563, 10.04416655, 9.95270383, 9.99062724, 11.02212563, 10.51327599, 11.11480286, 10.99573246], 
"M4": [0.00013709, 0.00018667, 0.00021549, 0.00021982, 0.00019833, 0.00015228, 8.559e-05, 3.32e-06, 8.255e-05, 0.00016661, 0.00023767, 0.00028656, 0.00030561, 0.00028964, 0.00023669, 0.00014857, 3.057e-05, 0.00010456, 0.0002468, 0.00037829, 0.00048134, 0.00053822, 0.00053308, 0.000454, 0.00029498, 5.625e-05, 0.00024285, 0.00058902, 0.00094433, 0.00126436, 0.00149558, 0.00157868, 0.00145346, 0.00106539, 0.00037302, 0.00063129, 0.00193761, 0.00346663, 0.0050791, 0.00655086, 0.00755491, 0.00764228, 0.00622247, 0.00254311, 0.00431887, 0.01550085, 0.03233207, 0.0563673, 0.08937953, 0.13334182, 0.19034749, 0.26221052, 0.34563298, 0.4898079, 0.61782791, 0.78304866, 0.98135894, 1.21592444, 1.49118793, 1.81366806, 2.19786765, 2.72740635, 2.52926886, 3.349176, 3.94723422, 4.57092789, 5.23797705, 5.94822106, 6.68912442, 7.41170875, 7.77753943, 11.851815, 11.24432481, 12.12216479, 13.18430761, 14.33956601, 15.57029776, 16.8876418, 18.36325, 20.46073441, 10.07119654, 20.12959559, 21.89492593, 23.27841549, 24.52137738, 25.66178452, 26.68683745, 27.52151327, 27.74505365, 42.12316268, 32.16937868, 32.3760779, 32.84872699, 33.32163237, 33.73361988, 34.06133023, 34.29332615, 34.42350086], 
"M5": [1e-08, 1e-08, 1e-08, 1e-08, 1e-08, 1e-08, 1e-08, 1e-08, 2e-08, 7e-08, 1.8e-07, 4.4e-07, 9.6e-07, 1.94e-06, 3.91e-06, 7.66e-06, 1.382e-05, 2.405e-05, 4.372e-05, 7.306e-05, 0.00011692, 0.00020211, 0.00029609, 0.00047951, 0.00067804, 0.00099194, 0.00151684, 0.00218395, 0.00317101, 0.00444323, 0.00591613, 0.00798949, 0.0109163, 0.01488609, 0.01913435, 0.02590705, 0.03315781, 0.04242618, 0.05381419, 0.06906539, 0.08717147, 0.1089274, 0.13590122, 0.15994834, 0.19898333, 0.24679504, 0.29669543, 0.37281173, 0.42496718, 0.48289215, 0.58670506, 0.71070769, 0.8327512, 0.97780689, 1.11403697, 1.23766983, 1.46183179, 1.75900964, 1.9428052, 2.29004694, 2.51077536, 2.75670554, 3.28107599, 3.51731898, 3.97920967, 4.58439788, 4.90041867, 5.25753812, 5.91275369, 6.44251039, 7.18532833, 8.11531691, 8.68988873, 8.98094939, 10.03765929, 10.14021114, 11.62048932, 12.28226449, 13.16103388, 13.91908044, 14.86830417, 15.39541366, 16.29411763, 17.48738931, 17.10465556, 17.36313934, 18.91210177, 20.12996463, 21.00613677, 21.15361985, 20.79557748, 23.27723554, 22.641215, 22.65111979, 24.88961614, 23.48134344, 24.60766812, 24.38758851], 
"M6": [1e-08, 1e-08, 1e-08, 1e-08, 1e-08, 1e-08, 1e-08, 2e-08, 1.4e-07, 3.9e-07, 9.9e-07, 2.36e-06, 5.28e-06, 1.115e-05, 2.25e-05, 4.406e-05, 9.99e-05, 0.00012672, 0.00022867, 0.00038775, 0.00063609, 0.00101567, 0.00158223, 0.00240416, 0.00353136, 0.00400698, 0.00869149, 0.01190594, 0.01661634, 0.02304813, 0.03167141, 0.04311253, 0.05822674, 0.07848837, 0.11225135, 0.11996163, 0.16319358, 0.21149407, 0.27004748, 0.34126184, 0.42738398, 0.53055892, 0.65186836, 0.7765438, 1.01930269, 1.20879717, 1.44801214, 1.72866931, 2.05347315, 2.42602189, 2.84910482, 3.32035676, 3.78162819, 4.72228981, 5.30953103, 6.07208016, 6.93533751, 7.8984173, 8.96961331, 10.16793992, 11.55162422, 13.51571403, 11.79197554, 14.8878887, 16.7409616, 18.55397916, 20.40979915, 22.31018997, 24.21145602, 25.94611852, 26.36627215, 39.21817276, 36.14922642, 37.99111381, 40.35614658, 42.93919606, 45.68187327, 48.61530854, 51.94201044, 56.95159464, 27.22450897, 54.35153199, 58.37608131, 61.33959716, 63.92186862, 66.24045198, 68.27584326, 69.84977452, 69.91845078, 105.40403334, 80.08938363, 80.22049563, 81.06215967, 81.95472502, 82.74919591, 83.39044134, 83.85236858, 84.12132625], 
"M7": [4.186e-05, 9.164e-05, 0.0001648, 0.00025842, 0.00039947, 0.00059265, 0.00081631, 0.00100891, 0.00144801, 0.00184616, 0.00238363, 0.00271816, 0.00365873, 0.00461802, 0.00584482, 0.00666484, 0.0074313, 0.00831315, 0.01289031, 0.01258552, 0.01361309, 0.01739019, 0.01840618, 0.02598585, 0.022397, 0.0246278, 0.03087993, 0.03037777, 0.034837, 0.03779857, 0.04294951, 0.04524418, 0.04705451, 0.04937062, 0.05508492, 0.05492564, 0.0565521, 0.05964108, 0.0791262, 0.0736546, 0.06475453, 0.07552887, 0.07815139, 0.08278946, 0.08764194, 0.09101841, 0.10479436, 0.11274116, 0.1392455, 0.13739064, 0.14847976, 0.16079062, 0.1641497, 0.1778604, 0.21141693, 0.20484632, 0.21866349, 0.26579769, 0.26714576, 0.2808872, 0.28583328, 0.28738725, 0.32720716, 0.32659015, 0.3457767, 0.34346182, 0.38217039, 0.3913906, 0.40260823, 0.42981069, 0.43303091, 0.44151523, 0.44005483, 0.49323478, 0.49505468, 0.54944192, 0.50383853, 0.55202164, 0.58038023, 0.55398507, 0.59185642, 0.60085898, 0.62647265, 0.64165766, 0.63016992, 0.63030828, 0.64682648, 0.67383103, 0.65374834, 0.65536663, 0.7135763, 0.68582132, 0.69643224, 0.74098857, 0.70944981, 0.74758527, 0.73373381, 0.7594107], 
"M8": [7.361e-05, 0.00017265, 0.00031478, 0.00051428, 0.00080221, 0.00112261, 0.00163303, 0.00270309, 0.00281246, 0.00384799, 0.00508997, 0.00591412, 0.00770733, 0.00992514, 0.012007, 0.01367064, 0.01857183, 0.01798354, 0.02224623, 0.02451331, 0.02996472, 0.03202187, 0.03652987, 0.04386979, 0.04529562, 0.04906644, 0.05587541, 0.05834827, 0.07119187, 0.0647819, 0.07954143, 0.07806491, 0.0813341, 0.09459285, 0.10219489, 0.09896882, 0.12204194, 0.13147799, 0.1382719, 0.15483203, 0.17948956, 0.19380175, 0.20966683, 0.23212448, 0.22776646, 0.25078221, 0.26490003, 0.28138723, 0.29177318, 0.31378826, 0.33266134, 0.34718867, 0.3571785, 0.40254813, 0.41010091, 0.42209828, 0.43841539, 0.44693875, 0.49274381, 0.48368945, 0.49623366, 0.4974336, 0.57323583, 0.56080487, 0.56831989, 0.58080642, 0.59916153, 0.60474656, 0.63007934, 0.62918982, 0.64226987, 0.67609489, 0.66834414, 0.72947235, 0.69515443, 0.71311285, 0.72501106, 0.73847532, 0.77636136, 0.78509748, 0.68653766, 0.7817662, 0.80403496, 0.82135695, 0.83459788, 0.84578792, 0.86162857, 0.87731922, 0.90432611, 0.67767419, 0.88902594, 0.90592942, 0.91792523, 0.92630937, 0.93093482, 0.93351788, 0.93602679, 0.93790806]}, 
"TimeStamp": "30/03/2023 13:19:09"},


"T111": {"TestNum": 111, 
"Name": "Fig 11a single step=0.01 tmax=200 All methods quantization", 
"F_List": [0.01, 0.02, 0.03, 0.04, 0.05, 0.06, 0.07, 0.08, 0.09, 0.1, 0.11, 0.12, 0.13, 0.14, 0.15, 0.16, 0.17, 0.18, 0.19, 0.2, 0.21, 0.22, 0.23, 0.24, 0.25, 0.26, 0.27, 0.28, 0.29, 0.3, 0.31, 0.32, 0.33, 0.34, 0.35, 0.36, 0.37, 0.38, 0.39, 0.4, 0.41, 0.42, 0.43, 0.44, 0.45, 0.46, 0.47, 0.48, 0.49], 
"T_max": 200, 
"n_freq": 49, 
"Methods": {
"M1": "Krig[20] r=6.50,n=1e-08  Sine  random-jitter  quantization=12  update-mode", 
"M2": "Krig[20] r=7.15,n=1e-08  Sine  missing-samples  quantization=12  update-mode", 
"M3": "Magrolis[10]  Sine  random-jitter  quantization=12  update-mode", 
"M4": "Magrolis[10]  Sine  missing-samples  quantization=12  update-mode", 
"M5": "Lagrange[10]  Sine  random-jitter  quantization=12  update-mode", 
"M6": "Lagrange[10]  Sine  missing-samples  quantization=12  update-mode", 
"M7": "Akima  Sine  random-jitter  quantization=12  update-mode", 
"M8": "Akima  Sine  missing-samples  quantization=12  update-mode"}, 
"RmseCenter": {
"M1": [0.00056853, 0.00051242, 0.00050004, 0.00058606, 0.00055423, 0.00059681, 0.00057494, 0.00060968, 0.00058944, 0.00055007, 0.00069462, 0.00064967, 0.00064816, 0.00081565, 0.00081207, 0.00098343, 0.00115358, 0.00144006, 0.00177645, 0.00233256, 0.00317897, 0.0039453, 0.00543064, 0.00767973, 0.01115996, 0.01584802, 0.02389613, 0.03525897, 0.0552977, 0.08072402, 0.12018425, 0.19344876, 0.313997, 0.53255381, 0.86731389, 1.33249648, 1.97249833, 2.61568461, 3.22564997, 3.95798432, 4.37311386, 4.72858502, 4.73955687, 5.00396309, 4.89472608, 4.38677868, 4.75368677, 5.0776049, 5.26790498], 
"M2": [0.00112696, 0.00130723, 0.00096094, 0.00103934, 0.00113911, 0.00139804, 0.00068122, 0.00094763, 0.00106256, 0.00112804, 0.00123744, 0.00114853, 0.00117495, 0.00136273, 0.00208386, 0.00254133, 0.0028885, 0.00510258, 0.00668469, 0.00852313, 0.01218081, 0.01837401, 0.02770293, 0.03813872, 0.05916749, 0.09847479, 0.15957407, 0.23027173, 0.36959523, 0.64698923, 1.14871154, 1.72822253, 2.82604077, 4.00945438, 5.27083293, 6.50213629, 7.41384876, 8.1404012, 8.57636961, 8.84576833, 9.47523157, 9.63678478, 10.12850926, 10.50149751, 10.45813022, 10.3825489, 9.49211625, 8.43963616, 7.5284617], 
"M3": [0.00098969, 0.000793, 0.00083209, 0.00093788, 0.00094672, 0.00098694, 0.00095198, 0.00103999, 0.00095098, 0.00085654, 0.00110341, 0.00109955, 0.00088549, 0.00106545, 0.00108938, 0.00105415, 0.00114091, 0.00140487, 0.00116864, 0.00105477, 0.00173552, 0.00303594, 0.00376214, 0.00318723, 0.00340956, 0.01384837, 0.03708962, 0.0760812, 0.1354199, 0.23041718, 0.36239138, 0.56100614, 0.77911853, 1.07807065, 1.4446742, 1.92168834, 2.51710528, 3.10763711, 3.81288442, 4.56782254, 5.38757413, 6.18422005, 6.7231313, 7.65386406, 8.76015663, 8.92690916, 9.95267959, 11.02209849, 11.11489837], 
"M4": [0.00274519, 0.00354202, 0.00213161, 0.00176419, 0.00310992, 0.0039901, 0.00214394, 0.00241819, 0.00311997, 0.00192931, 0.00281234, 0.00268961, 0.00239029, 0.00146362, 0.00275449, 0.00293968, 0.00274914, 0.00264596, 0.00311097, 0.00531769, 0.00734233, 0.00651317, 0.00448759, 0.0314216, 0.08938151, 0.19125164, 0.34659077, 0.61761872, 0.98087329, 1.49072763, 2.19800036, 2.52823645, 3.94688049, 5.23855194, 6.68948707, 7.77669775, 11.24446877, 13.18453826, 15.56994585, 18.36328951, 10.07112921, 21.89442999, 24.52104047, 26.6869624, 27.74453355, 32.16964704, 32.84852289, 33.73488497, 34.29310799], 
"M5": [0.00225796, 0.00185656, 0.00192044, 0.00212471, 0.00218155, 0.00225874, 0.00218052, 0.00235902, 0.00218031, 0.00196952, 0.00249684, 0.00245992, 0.0021132, 0.00269766, 0.00395475, 0.00634719, 0.0109017, 0.01947631, 0.03347392, 0.05395838, 0.08726433, 0.135812, 0.19931651, 0.29691344, 0.42502587, 0.58689761, 0.83256295, 1.11399859, 1.46179915, 1.94276234, 2.51075891, 3.28119268, 3.97914115, 4.90054389, 5.91260603, 7.18548993, 8.6902053, 10.03802026, 11.62032933, 13.16106909, 14.86790411, 16.29394082, 17.10476968, 18.91171238, 21.00674895, 20.79569796, 22.64118609, 24.88958653, 24.60783204], 
"M6": [0.00699141, 0.00911233, 0.0054118, 0.00474066, 0.00798449, 0.01001954, 0.00546894, 0.00649563, 0.00792748, 0.0053188, 0.00738962, 0.00759442, 0.00740704, 0.00869016, 0.01577234, 0.03179078, 0.05360353, 0.1147351, 0.16421728, 0.27033514, 0.42896288, 0.65152263, 1.01843914, 1.44551838, 2.05347427, 2.85155513, 3.7838188, 5.30907191, 6.93401584, 8.96828927, 11.5520322, 11.78916043, 16.74020002, 20.41133612, 24.21236196, 26.36388393, 36.14961282, 40.35701078, 45.68095056, 51.94212492, 27.22419102, 58.3747766, 63.9210093, 68.27610356, 69.91749636, 80.09021501, 81.0619674, 82.7525011, 83.85198311], 
"M7": [0.00020375, 0.0002435, 0.00044375, 0.00083859, 0.0014508, 0.00240009, 0.00366702, 0.00586825, 0.00742747, 0.01289331, 0.01363402, 0.01840962, 0.02240023, 0.03086833, 0.03483323, 0.04295167, 0.04705931, 0.05507599, 0.05657058, 0.07910601, 0.06475704, 0.07811863, 0.08763043, 0.10481519, 0.13935904, 0.14848178, 0.16415087, 0.21140078, 0.21866501, 0.26713972, 0.28583211, 0.3272103, 0.34576439, 0.38216634, 0.40261839, 0.43302559, 0.44005008, 0.49505442, 0.50384221, 0.58037248, 0.59186436, 0.6264754, 0.63017823, 0.64683035, 0.65375185, 0.71357994, 0.69643381, 0.70944676, 0.73372765], 
"M8": [0.00021349, 0.00033628, 0.00080839, 0.00166259, 0.00283166, 0.00511241, 0.00771206, 0.01199808, 0.0185454, 0.02221162, 0.02995637, 0.03652229, 0.04530395, 0.05587425, 0.07117255, 0.07956073, 0.08132189, 0.10215725, 0.12201721, 0.13826143, 0.17947847, 0.20968004, 0.22776949, 0.26489487, NaN, 0.33265807, 0.35718208, 0.41008527, 0.4384341, 0.49274445, 0.49622664, 0.573239, 0.56832102, 0.5991467, 0.63007548, 0.64215705, 0.66831947, 0.69513456, 0.72501203, 0.7763481, 0.68653682, 0.80402969, 0.83459619, 0.86162373, 0.90431754, 0.88899737, 0.91791758, 0.93093066, 0.93602272]}, 
"TimeStamp": "30/03/2023 13:15:56"},


"T112": {"TestNum": 112, 
"Name": "Fig 11b single step=0.01 tmax=200 All methods noise", 
"F_List": [0.01, 0.02, 0.03, 0.04, 0.05, 0.06, 0.07, 0.08, 0.09, 0.1, 0.11, 0.12, 0.13, 0.14, 0.15, 0.16, 0.17, 0.18, 0.19, 0.2, 0.21, 0.22, 0.23, 0.24, 0.25, 0.26, 0.27, 0.28, 0.29, 0.3, 0.31, 0.32, 0.33, 0.34, 0.35, 0.36, 0.37, 0.38, 0.39, 0.4, 0.41, 0.42, 0.43, 0.44, 0.45, 0.46, 0.47, 0.48, 0.49], 
"T_max": 200, 
"n_freq": 49, 
"Methods": {
"M1": "Krig[20] r=6.50,n=1e-06  Sine  random-jitter  noise=0.001  update-mode", 
"M2": "Krig[20] r=7.15,n=1e-06  Sine  missing-samples  noise=0.001  update-mode", 
"M3": "Magrolis[10]  Sine  random-jitter  noise=0.001  update-mode", 
"M4": "Magrolis[10]  Sine  missing-samples  noise=0.001  update-mode", 
"M5": "Lagrange[10]  Sine  random-jitter  noise=0.001  update-mode", 
"M6": "Lagrange[10]  Sine  missing-samples  noise=0.001  update-mode", 
"M7": "Akima  Sine  random-jitter  noise=0.001  update-mode", 
"M8": "Akima  Sine  missing-samples  noise=0.001  update-mode"}, 
"RmseCenter": {
"M1": [0.00136317, 0.00144145, 0.00135875, 0.00137432, 0.00143694, 0.00141089, 0.00144233, 0.00148752, 0.00153666, 0.00147156, 0.00153118, 0.00179507, 0.00181044, 0.00191837, 0.00209208, 0.00258355, 0.00345042, 0.00413031, 0.00498551, 0.00662818, 0.00936943, 0.0121117, 0.01657503, 0.02290383, 0.03346941, 0.04687025, 0.06844591, 0.10075878, 0.15817844, 0.24952648, 0.37634754, 0.53616626, 0.72475422, 0.91118284, 1.0570587, 1.22557794, 1.37904796, 1.38815905, 1.43338362, 1.2533463, 1.31819034, 1.33345861, 1.42522577, 1.49414759, 1.493873, 1.48527987, 1.54913738, 1.49007186, 1.56135217], 
"M2": [0.00153003, 0.00178936, 0.00160193, 0.00176515, 0.00187393, 0.00163665, 0.00186548, 0.00183444, 0.00153552, 0.00201559, 0.00224263, 0.00289398, 0.00286648, 0.00365226, 0.00511673, 0.0066447, 0.00877932, 0.01321538, 0.01635167, 0.02268802, 0.03106846, 0.04693061, 0.07020638, 0.1048816, 0.1534188, 0.24183719, 0.38894402, 0.63700609, 0.93727473, 1.28040988, 1.63520505, 1.7166366, 2.07084273, 2.20641393, 2.2750926, 2.3336596, 2.41897703, 2.52850014, 2.61194463, 2.59329591, 3.36803296, 2.5541014, 2.37499174, 2.27008889, 2.25824227, 2.33221317, 2.44097358, 2.55426309, 2.6379465], 
"M3": [0.00448926, 0.00449547, 0.00447608, 0.0044751, 0.0044795, 0.00447401, 0.00447815, 0.00449342, 0.0044838, 0.00448311, 0.0044836, 0.0044759, 0.00446073, 0.00448027, 0.00447996, 0.00450793, 0.00463156, 0.00451558, 0.00453144, 0.00441757, 0.00446153, 0.0052577, 0.00571526, 0.00549336, 0.00538842, 0.01482743, 0.03674549, 0.07641365, 0.13611424, 0.22999777, 0.36211498, 0.56092414, 0.7791888, 1.07837795, 1.4443249, 1.92139078, 2.51638585, 3.10684717, 3.81216217, 4.56712271, 5.38638415, 6.18450078, 6.72251337, 7.65384501, 8.75981538, 8.92669236, 9.95299764, 11.02076387, 11.11475045], 
"M4": [0.01383616, 0.01391177, 0.01389848, 0.01391068, 0.01391283, 0.01388848, 0.01392061, 0.01379774, 0.0138921, 0.01398788, 0.01386177, 0.01386163, 0.01384551, 0.0138257, 0.01399023, 0.01384206, 0.01452227, 0.0138801, 0.01335307, 0.01504957, 0.01650004, 0.01561315, 0.01564872, 0.03350853, 0.09163735, 0.1855668, 0.34628025, 0.61422403, 0.98168771, 1.4929179, 2.19760559, 2.525478, 3.94982708, 5.23663594, 6.69381994, 7.77767085, 11.24699127, 13.18489591, 15.56870095, 18.36470272, 10.0749731, 21.89197312, 24.52317322, 26.68330582, 27.74401341, 32.16760622, 32.84673251, 33.73521544, 34.29089402], 
"M5": [0.010619, 0.010619, 0.010619, 0.010619, 0.01061901, 0.01061899, 0.01061898, 0.0106193, 0.01061932, 0.01061589, 0.01061877, 0.0106445, 0.01069285, 0.01073374, 0.01113464, 0.01221548, 0.01643731, 0.02129975, 0.03513992, 0.05668813, 0.0896107, 0.13628955, 0.19989009, 0.29726413, 0.42493768, 0.58781625, 0.83150305, 1.11455281, 1.46293871, 1.94154113, 2.50990032, 3.28097013, 3.9790878, 4.90143925, 5.91163157, 7.18511201, 8.6882261, 10.03576189, 11.61818144, 13.15933903, 14.86510859, 16.29466099, 17.10302857, 18.91143397, 21.00544508, 20.79499221, 22.64178885, 24.88676003, 24.60780222], 
"M6": [0.03529936, 0.03529936, 0.03529936, 0.03529936, 0.0352994, 0.03529937, 0.03529973, 0.03528974, 0.03530576, 0.03520562, 0.03535982, 0.03548785, 0.03605037, 0.0337339, 0.03982359, 0.04615423, 0.07975244, 0.11552807, 0.17894565, 0.26975157, 0.42463785, 0.65065344, 1.03055176, 1.4441233, 2.05529079, 2.83525876, 3.78370293, 5.29981913, 6.93691237, 8.97394297, 11.55039191, 11.78131474, 16.74770191, 20.4080874, 24.22359002, 26.36560225, 36.15589339, 40.35677506, 45.67821331, 51.94637499, 27.23501501, 58.36816773, 63.92468449, 68.26732094, 69.91674225, 80.08540185, 81.05788262, 82.75225288, 83.84555486], 
"M7": [0.00099816, 0.00103414, 0.00107707, 0.0012857, 0.00174463, 0.00254893, 0.00378782, 0.005822, 0.00743032, 0.01290754, 0.01364816, 0.01840025, 0.02243084, 0.0308441, 0.03483633, 0.04301068, 0.04707738, 0.05505518, 0.05654796, 0.0792253, 0.06477926, 0.0781658, 0.08775397, 0.1046997, 0.13927378, 0.14844614, 0.16410939, 0.21146398, 0.21872671, 0.26714693, 0.2859325, 0.32717059, 0.34579959, 0.38215833, 0.40263769, 0.43302978, 0.44008665, 0.49504542, 0.50389958, 0.58040974, 0.59189535, 0.62647095, 0.63019108, 0.64686542, 0.65376426, 0.71357727, 0.69644875, 0.70950682, 0.73373686], 
"M8": [0.00100864, 0.00104429, 0.0012453, 0.00188546, 0.00295956, 0.00511133, 0.00775048, 0.01187067, 0.01848283, 0.02220158, 0.02990478, 0.03650635, 0.04534701, 0.05584456, 0.07118479, 0.07979164, 0.0812824, 0.10219466, 0.12168192, 0.13817301, 0.17939166, 0.20958241, 0.22768866, 0.26467448, 0.29166712, 0.33258821, 0.35707611, 0.40999754, 0.43840515, 0.49264979, 0.49617715, 0.57325906, 0.56823377, 0.59915328, 0.62999241, 0.64202033, 0.66831993, 0.69511881, 0.72506802, 0.77626055, 0.68650318, 0.80393658, 0.8344839, 0.8616396, 0.90431767, 0.88894694, 0.91789484, 0.93104336, 0.93605332]}, 
"TimeStamp": "30/03/2023 13:10:18"},

"T120": {"TestNum": 120, 
"Name": "Test Nugget Kriging single delay", 
"F_List": [0.01, 0.02, 0.03, 0.04, 0.05, 0.06, 0.07, 0.08, 0.09, 0.1, 0.11, 0.12, 0.13, 0.14, 0.15, 0.16, 0.17, 0.18, 0.19, 0.2, 0.21, 0.22, 0.23, 0.24, 0.25, 0.26, 0.27, 0.28, 0.29, 0.3, 0.31, 0.32, 0.33, 0.34, 0.35, 0.36, 0.37, 0.38, 0.39, 0.4, 0.41, 0.42, 0.43, 0.44, 0.45, 0.46, 0.47, 0.48, 0.49], 
"T_max": 200, 
"n_freq": 49, 
"Methods": {
"M1": "Krig[20] r=7.15  Sine  missing-samples  quantization=12  update-mode", 
"M2": "Krig[20] r=7.15  Sine  missing-samples  noise=0.001  update-mode", 
"M3": "Krig[20] r=7.15,n=1e-08  Sine  missing-samples  quantization=12  update-mode", 
"M4": "Krig[20] r=7.15,n=1e-06  Sine  missing-samples  noise=0.001  update-mode"}, 
"RmseCenter": {
"M1": [0.01477536, 0.01237776, 0.00958469, 0.00834158, 0.01218603, 0.01476894, 0.00773555, 0.01086936, 0.01178076, 0.00966619, 0.01010516, 0.01228817, 0.00990374, 0.00680076, 0.01244754, 0.01349302, 0.01445677, 0.01394425, 0.00991537, 0.00713122, 0.01187144, 0.00945409, 0.01676961, 0.02131087, 0.01593116, 0.03433366, 0.06446016, 0.08382091, 0.12846845, 0.28320659, 0.5408138, 0.88852885, 0.93895892, 1.39473567, 3.78669988, 8.59457027, 17.79847075, 29.95274868, 45.90224751, 63.98336752, 118.14507441, 113.99413051, 131.82669692, 144.74215903, 146.87328562, 157.31358774, 145.54114331, 132.16928957, 119.98462921], 
"M2": [0.05424835, 0.05426879, 0.05426967, 0.05429633, 0.05429224, 0.05426974, 0.05429207, 0.05423563, 0.05426207, 0.05432336, 0.05428347, 0.05427885, 0.05415613, 0.05418684, 0.05421955, 0.05418551, 0.05455653, 0.0543387, 0.05391045, 0.05386748, 0.0544152, 0.05531399, 0.05634868, 0.05856347, 0.04723957, 0.05976908, 0.07932281, 0.08633526, 0.13640901, 0.2811574, 0.55689855, 0.89366837, 0.95248279, 1.37543468, 3.78121205, 8.59075991, 17.77976833, 29.93291694, 45.92377098, 63.96951773, 118.14706713, 113.98562284, 131.86434069, 144.72116985, 146.86156684, 157.30271666, 145.52927249, 132.17232919, 119.98768713], 
"M3": [0.00112696, 0.00130723, 0.00096094, 0.00103934, 0.00113911, 0.00139804, 0.00068122, 0.00094763, 0.00106256, 0.00112804, 0.00123744, 0.00114853, 0.00117495, 0.00136273, 0.00208386, 0.00254133, 0.0028885, 0.00510258, 0.00668469, 0.00852313, 0.01218081, 0.01837401, 0.02770293, 0.03813872, 0.05916749, 0.09847479, 0.15957407, 0.23027173, 0.36959523, 0.64698923, 1.14871154, 1.72822253, 2.82604077, 4.00945438, 5.27083293, 6.50213629, 7.41384876, 8.1404012, 8.57636961, 8.84576833, 9.47523157, 9.63678478, 10.12850926, 10.50149751, 10.45813022, 10.3825489, 9.49211625, 8.43963616, 7.5284617], 
"M4": [0.00153003, 0.00178936, 0.00160193, 0.00176515, 0.00187393, 0.00163665, 0.00186548, 0.00183444, 0.00153552, 0.00201559, 0.00224263, 0.00289398, 0.00286648, 0.00365226, 0.00511673, 0.0066447, 0.00877932, 0.01321538, 0.01635167, 0.02268802, 0.03106846, 0.04693061, 0.07020638, 0.1048816, 0.1534188, 0.24183719, 0.38894402, 0.63700609, 0.93727473, 1.28040988, 1.63520505, 1.7166366, 2.07084273, 2.20641393, 2.2750926, 2.3336596, 2.41897703, 2.52850014, 2.61194463, 2.59329591, 3.36803296, 2.5541014, 2.37499174, 2.27008889, 2.25824227, 2.33221317, 2.44097358, 2.55426309, 2.6379465]}, 
"TimeStamp": "30/03/2023 12:58:31"},

"T130": {"TestNum": 130, 
"Name": "Fig 12 Future samples Kriging", 
"F_List": [0.01, 0.02, 0.03, 0.04, 0.05, 0.06, 0.07, 0.08, 0.09, 0.1, 0.11, 0.12, 0.13, 0.14, 0.15, 0.16, 0.17, 0.18, 0.19, 0.2, 0.21, 0.22, 0.23, 0.24, 0.25, 0.26, 0.27, 0.28, 0.29, 0.3, 0.31, 0.32, 0.33, 0.34, 0.35, 0.36, 0.37, 0.38, 0.39, 0.4, 0.41, 0.42, 0.43, 0.44, 0.45, 0.46, 0.47, 0.48, 0.49], 
"T_max": 200, 
"n_freq": 49, 
"Methods": {
"M1": "Krig[20] r=7.15,future=0  Sine  missing-samples  update-mode", 
"M2": "Krig[20] r=7.15,n=1e-06,future=0  Sine  missing-samples  noise=0.001  update-mode", 
"M3": "Krig[20] r=7.15  Sine  missing-samples  update-mode", 
"M4": "Krig[20] r=7.15,n=1e-06  Sine  missing-samples  noise=0.001  update-mode", 
"M5": "Krig[20] r=7.15,future=2  Sine  missing-samples  update-mode", 
"M6": "Krig[20] r=7.15,n=1e-06,future=2  Sine  missing-samples  noise=0.001  update-mode", 
"M7": "Krig[20] r=7.15,future=3  Sine  missing-samples  update-mode", 
"M8": "Krig[20] r=7.15,n=1e-06,future=3  Sine  missing-samples  noise=0.001  update-mode", 
"M9": "Krig[20] r=7.15,future=4  Sine  missing-samples  update-mode", 
"M10": "Krig[20] r=7.15,n=1e-06,future=4  Sine  missing-samples  noise=0.001  update-mode"}, 
"RmseCenter": {
"M1": [0.00264939, 0.00401759, 0.00371516, 0.00316544, 0.00389424, 0.00469759, 0.00463228, 0.00556185, 0.00560668, 0.0071219, 0.00852102, 0.01151181, 0.01213519, 0.01406065, 0.02160599, 0.02789051, 0.03322934, 0.05384193, 0.06965814, 0.08232811, 0.12174445, 0.20576638, 0.27058167, 0.32230383, 0.56529858, 1.01396133, 1.44758655, 2.05929182, 4.02208578, 7.63250377, 11.57738401, 14.57172958, 19.9878895, 49.494028, 114.99125409, 215.54107529, 419.94532241, 647.01966682, 931.18118145, 1237.23210068, 2120.3518763, 2029.7561336, 2289.14002143, 2454.30391179, 2435.17344673, 2545.15293005, 2314.11973057, 2076.00567234, 1873.22176696], 
"M2": [0.01925761, 0.02068571, 0.01960267, 0.01584825, 0.01873621, 0.02112931, 0.02258894, 0.02860495, 0.03247826, 0.03246299, 0.03348447, 0.04091333, 0.05036406, 0.05795568, 0.08041674, 0.10054664, 0.12024319, 0.15775106, 0.23997171, 0.32108751, 0.42695866, 0.62348076, 0.95336703, 1.38976926, 1.99938245, 3.05932667, 5.00425093, 7.59395444, 11.13212547, 14.98125529, 18.50289708, 24.20271226, 24.67891879, 25.77495159, 26.405947, 28.08598676, 24.99234547, 26.00897522, 26.05973799, 25.18402418, 31.01085956, 24.1515642, 22.8261715, 22.09596811, 21.69568261, 22.81474053, 23.3354993, 24.21320046, 24.95790822], 
"M3": [9.197e-05, 0.00011283, 9.415e-05, 0.00013332, 0.00013005, 0.00010743, 0.00016221, 0.0001753, 9.619e-05, 0.00024051, 0.00027432, 0.00029902, 0.00051704, 0.00054712, 0.00054174, 0.00092853, 0.00129667, 0.00122982, 0.00223929, 0.00348393, 0.00392099, 0.00621275, 0.0116507, 0.01534203, 0.01608418, 0.03101965, 0.05772531, 0.08388621, 0.12818917, 0.28354931, 0.54171108, 0.8900909, 0.94043572, 1.39635785, 3.78730464, 8.59187022, 17.79795067, 29.95208877, 45.90231306, 63.9837678, 118.14579506, 113.99581931, 131.83016446, 144.74298347, 146.87870381, 157.31558683, 145.544618, 132.1672924, 119.98662593], 
"M4": [0.00153003, 0.00178936, 0.00160193, 0.00176515, 0.00187393, 0.00163665, 0.00186548, 0.00183444, 0.00153552, 0.00201559, 0.00224263, 0.00289398, 0.00286648, 0.00365226, 0.00511673, 0.0066447, 0.00877932, 0.01321538, 0.01635167, 0.02268802, 0.03106846, 0.04693061, 0.07020638, 0.1048816, 0.1534188, 0.24183719, 0.38894402, 0.63700609, 0.93727473, 1.28040988, 1.63520505, 1.7166366, 2.07084273, 2.20641393, 2.2750926, 2.3336596, 2.41897703, 2.52850014, 2.61194463, 2.59329591, 3.36803296, 2.5541014, 2.37499174, 2.27008889, 2.25824227, 2.33221317, 2.44097358, 2.55426309, 2.6379465], 
"M5": [1.768e-05, 2.375e-05, 2.114e-05, 1.961e-05, 2.485e-05, 2.715e-05, 2.477e-05, 3.005e-05, 3.341e-05, 3.794e-05, 5.285e-05, 6.45e-05, 6.731e-05, 0.00011998, 0.00015251, 0.00013905, 0.00021378, 0.00031481, 0.00030703, 0.00054717, 0.00092044, 0.00102607, 0.00185782, 0.0036568, 0.00477224, 0.00545297, 0.01153665, 0.01934455, 0.02401251, 0.04371997, 0.11045625, 0.20066407, 0.28273506, 0.32833243, 0.70600969, 1.9118837, 3.75643101, 6.70095597, 10.86375527, 16.44486319, 29.91210979, 31.08242965, 35.88178716, 39.87863642, 42.30219638, 47.83949554, 46.02938146, 42.91631777, 39.84611609], 
"M6": [0.00106151, 0.00104004, 0.00109044, 0.00106007, 0.00106353, 0.0011164, 0.00101218, 0.00108927, 0.00109702, 0.00112488, 0.00119094, 0.00118877, 0.00140162, 0.0015729, 0.00170398, 0.0025628, 0.00289962, 0.00341457, 0.00554397, 0.00762103, 0.01092173, 0.01609992, 0.02453946, 0.03809697, 0.05942684, 0.09440518, 0.15447593, 0.25314622, 0.39232945, 0.56393425, 0.74989207, 0.8009202, 0.97644757, 1.02839545, 1.03083648, 0.97024729, 1.16032089, 1.1982334, 1.25231017, 1.27117591, 1.36943976, 1.26372076, 1.25899304, 1.27362344, 1.30112771, 1.25706765, 1.2838239, 1.31888655, 1.35745623], 
"M7": [1.429e-05, 1.491e-05, 1.364e-05, 1.563e-05, 1.623e-05, 1.423e-05, 1.329e-05, 1.204e-05, 1.361e-05, 1.962e-05, 2.692e-05, 3.419e-05, 4.699e-05, 5.99e-05, 6.296e-05, 6.886e-05, 7.902e-05, 8.309e-05, 0.00013411, 0.00019975, 0.00028844, 0.00054862, 0.00101488, 0.00156773, 0.00236332, 0.00383881, 0.00665562, 0.01033375, 0.01390112, 0.02170094, 0.04915514, 0.09331046, 0.1447247, 0.20506628, 0.42506626, 1.06314442, 1.90268758, 2.57493798, 3.89454532, 8.02691746, 14.52179799, 16.97285683, 16.63134371, 16.94561475, 21.68611565, 27.74149835, 27.36413668, 23.78787184, 20.22718684], 
"M8": [0.0009741, 0.0009909, 0.00096519, 0.00098007, 0.00097931, 0.0009782, 0.00100089, 0.00098701, 0.00098633, 0.00098787, 0.00097179, 0.0010331, 0.00103614, 0.0011598, 0.00119491, 0.00134466, 0.00177136, 0.00232342, 0.00292111, 0.00434122, 0.00609703, 0.00869391, 0.01372825, 0.02188013, 0.03464398, 0.05532538, 0.097505, 0.16629077, 0.27613199, 0.41091451, 0.53999703, 0.70024249, 0.73517597, 0.78295237, 0.81960729, 0.83411204, 0.92392839, 0.96782712, 1.02202868, 1.06861479, 0.95845036, 1.09260741, 1.12241834, 1.15411797, 1.19596187, 1.16237698, 1.18931307, 1.20030284, 1.20481367], 
"M9": [1.635e-05, 1.669e-05, 1.544e-05, 1.682e-05, 1.795e-05, 1.593e-05, 1.4e-05, 1.404e-05, 1.377e-05, 2.061e-05, 2.664e-05, 3.102e-05, 4.502e-05, 5.844e-05, 5.579e-05, 5.185e-05, 6.188e-05, 4.583e-05, 7.443e-05, 0.00014907, 0.00021629, 0.00045901, 0.0009638, 0.00143122, 0.00184173, 0.00328683, 0.00636607, 0.00939155, 0.01166514, 0.02015563, 0.04498008, 0.08032985, 0.10922688, 0.16531168, 0.4012535, 0.98207987, 1.67723502, 1.67742884, 1.87921118, 6.20790716, 11.42182393, 13.78001736, 11.03353871, 9.01840902, 15.99203807, 22.51785687, 22.39174838, 18.02523494, 13.32713775], 
"M10": [0.00094872, 0.00095035, 0.00095311, 0.00095006, 0.00096055, 0.00095475, 0.00095173, 0.00095622, 0.00094504, 0.00094855, 0.00094111, 0.00094747, 0.00097225, 0.00099274, 0.00109472, 0.00115566, 0.00143801, 0.00175052, 0.00221219, 0.00310656, 0.00439039, 0.00624717, 0.00993844, 0.01634959, 0.02666709, 0.04401051, 0.07903214, 0.14359681, 0.24422781, 0.36890726, 0.48740512, 0.63776136, 0.67635007, 0.73836894, 0.79895763, 0.86375614, 0.90844228, 0.98097526, 1.04991367, 1.10904156, 0.93099129, 1.14049425, 1.18430365, 1.22790288, 1.27876081, 1.24860487, 1.27704977, 1.28745227, 1.2904286]}, 
"TimeStamp": "04/04/2023 13:34:54"}


}
